# Supplementary material for: Controllability and Robustness of Functional and Structural Connectomic Networks in Glioma Patients
Source: Cancers (Basel). 2023 May 11;15(10):2714. doi: 10.3390/cancers15102714 (PMC10216571; doi:10.3390/cancers15102714)
Supplement: Supplementary file 1 [file cancers-15-02714-s001.zip › Supplement S2.pdf]

S2: A detailed list of included DMN ROIs

| Lobe          | Gyrus                         | Left and Right Hemisphere | Label ID.L | Label ID.R | Anatomical and modified Cyto-architectonic descriptions | lh.MNI(X,Y,Z) | rh.MNI(X,Y,Z) |
|---------------|-------------------------------|---------------------------|------------|------------|---------------------------------------------------------|---------------|---------------|
| Frontal Lobe  | SFG, superior frontal gyrus   | SFG_L(R)_7_6              | 11         | 12         | <i>A9m, medial area 9</i>                               | -5, 36, 38    | 6, 38, 35     |
|               |                               | SFG_L(R)_7_7              | 13         | 14         | <i>A10m, medial area 10</i>                             | -8, 56, 15    | 8, 58, 13     |
|               | OrG, Orbital Gyrus            | OrG_L(R)_6_1              | 41         | 42         | <i>A14m, medial area 14</i>                             | -7, 54, -7    | 6, 47, -7     |
| Temporal Lobe | MTG, Middle Temporal Gyrus    | MTG_L(R)_4_1              | 81         | 82         | <i>A21c, caudal area 21</i>                             | -65, -30, -12 | 65, -29, -13  |
|               |                               | MTG_L(R)_4_2              | 83         | 84         | <i>A21r, rostral area 21</i>                            | -53, 2, -30   | 51, 6, -32    |
| Parietal Lobe | IPL, Inferior Parietal Lobule | IPL_L(R)_6_1              | 135        | 136        | <i>A39c, caudal area 39(PGp)</i>                        | -34, -80, 29  | 45, -71, 20   |
|               |                               | IPL_L(R)_6_2              | 137        | 138        | <i>A39rd, rostr dors al area 39(Hip3)</i>               | -38, -61, 46  | 39, -65, 44   |
|               |                               | IPL_L(R)_6_5              | 143        | 144        | <i>A39rv, rostroventral area 39(PGa)</i>                | -47, -65, 26  | 53, -54, 25   |
|               | Pcun, Precuneus               | PCun_L(R)_4_3             | 151        | 152        | <i>dmPOS, dorsomedial parietooccipital sulcus(PER)</i>  | -12, -67, 25  | 16, -64, 25   |
|               |                               | PCun_L(R)_4_4             | 153        | 154        | <i>A31, area 31 (Lc1)</i>                               | -6, -55, 34   | 6, -54, 35    |
| Limbic Lobe   | CG, Cingulate Gyrus           | CG_L(R)_7_1               | 175        | 176        | <i>A23d, dorsal area 23</i>                             | -4, -39, 31   | 4, -37, 32    |
|               |                               | CG_L(R)_7_4               | 181        | 182        | <i>A23v, ventral area 23</i>                            | -8, -47, 10   | 9, -44, 11    |
|               |                               | CG_L(R)_7_7               | 187        | 188        | <i>A32sg, subgenual area 32</i>                         | -4, 39, -2    | 5, 41, 6      |

Note. Modified table based on the file “BNA\_subregions.xlsx” downloaded from the Brainnetome Atlas homepage (<https://atlas.brainnetome.org/download.html>.)
